# Supplementary material for: Trusting Intelligent Automation in Expert Work: Accounting Practitioners’ Experiences and Perceptions
Source: Springer Nature journal article supplement (doi:10.1007/s10606-024-09499-6), 2024-04-30
Supplement: MOESM1 [file 27041896]

**Interview questions: Trusting Intelligent Automation in Expert Work: Accounting Practitioners’ Experiences and Perceptions**

The interview includes the context, the user, and the product. The participants are [company] clients who are already using the product (the intelligent automation tool). The scale of automation can vary according to the user.

**Use context**

1. How long have you used the automation tool, and how do you use it?
2. How many clients do you have in the automation tool?
3. Do you use other accounting systems with the automation tool?
4. What kind of tasks does automation tool do?
5. What positive or negative experiences do you have with the automation tool?
6. What tasks does the automation tool make easier or more fluent?
7. Has the automation tool made some tasks more challenging or difficult?
8. What kind of positive or negative experiences do you have about the implementation process?
9. Who in your organization decided to start using the automation tool?
10. Is there something you hope you would have done differently?

**User**

1. Describe yourself as a technology user.
2. How do you react to new technology?
3. How would you describe trust in technology?
4. What does trust in technology mean to you?
5. What kind of uncertainty or risks do you see when using the automation tool in your work?
6. Do you feel confident when you are using the automation tool?
7. What increases or decreases your self-confidence as a user of the automation tool?
8. Do you find it easy to trust the automation tool or hand over tasks to it?
9. If yes, why? What increases your trust in the automation tool?
10. If not, why? What decreases your trust in the automation tool?
11. How does trust in your colleague differ from trust in the automation tool?
12. What would make you trust the automation tool as much as your colleague?
13. Could you describe your trust in the developers of the automation tool?

a. Does trust in developers influence your trust in the automation

tool?

b. What increases or decreases your trust in developers of the

automation tool?

**Automation tool**

1. **Scenario 1: ideal trust, building trust**

*You are starting to use new technology in your work. The purpose of this technology is to automatize invoice processing: to reduce your workload and free time for more challenging tasks. You can choose how much and what invoice to automate. What motivates you to increase the automated invoice processing?*

- What kind of feelings and requirements do you have before the implementation process? What is required for you to use the automation tool?
- How does your trust in the automation tool change at the beginning of the use and during the use?
- What increases your trust in the automation tool?
- What decreases your trust in the automation tool?

1. **Scenario 2: trust repair**

*You have started using the automation tool and used it for a couple of months. Your work performance has enhanced, and you are more productive. Then you notice that the automation tool has made errors and accepted erroneous invoices. What do you do?*

- How do you notice the error?
- What kind of feelings do you have in this situation?
- What kind of actions does this situation cause?
- After the situation is solved, how do you continue the use of the automation tool?
- Does this situation change the way you use the automation tool?
- What is required so that you can use the automation tool in manner similar to how it was before the error situation?

**Product demo**

1. How do you feel about the product’s user interface? Do you find it understandable?
2. Has the use of the automation tool changed during use? Have you started to use some new functionalities?
3. Are there some sections that are not understandable to you and for which you need more explanation?

**Accuracy percentage (of invoices)**

1. What does this percentage tell you? Is it clear and informative enough?
2. Do you have enough information about what you should do if the percentage is low? What kind of information do you need?

**UI**

- Is this red/yellow mark clear enough for you?
- Is this explanation clear and informative enough for you?
- Do you know what value you need to double-check?
- Do you know how to do it?
- If you were using intelligent automation, would this be enough to gain your attention?

**If the user uses the intelligent automation tool:**

1. Do you feel you got enough information and guidance during the implementation process? If not, what kind of guidance would you have hoped for?
2. Do you feel you get enough information and guidance during the use? If not, what kind of guidance do you hope for?

**If the user doesn’t use the intelligent automation tool:**

1. What kind of information or guidance do you feel you need when you start to use intelligent automation? How about during use?
2. What elements should be in the automation tool that would make you increase the use of automation?
3. What do you hope would be different in the automation tool? Why?

**Extra questions**

- How important is it for you to see that the developers understand accounting expertise? Should the developers have experience in accounting? Does this affect your trust in the automation tool?
- Does the automation tool change your expertise? How?
- What is the role of human competence and expertise in your work?
- What tasks in your work require human input? What kind of knowledge is this?
